institutions and countries, more academic credit and even financial support go to publications in journals with impact factors above 6, so breaking that threshold for the first time last year will likely lead to even greater success in the future.

In the end, our mission remains to promote new discovery that advances our understanding and care of our patients. To do this, we must first attract the best work we can. At *ANESTHESIOLOGY*, we are not a sieve, passively responding to material sent to us. Rather, a dedicated group of editors, associate editors, reviewers, and staff are actively trying to improve author service, journal readability, and journal

outreach so that we can provide you the best and most exciting new science we can. Stay tuned!

### Competing Interests

Dr. Eisenach is the Editor-in-Chief of *ANESTHESIOLOGY*, and his institution receives salary support from the American Society of Anesthesiologists (Schaumburg, Illinois) for this position.

### Correspondence

Address correspondence to Dr. Eisenach: [editor-in-chief@anesthesiology.org](mailto:editor-in-chief@anesthesiology.org)

## ANESTHESIOLOGY REFLECTIONS FROM THE WOOD LIBRARY-MUSEUM

### From Greek to Arabic: “Tom Morton” Cigar Box Label, Part I

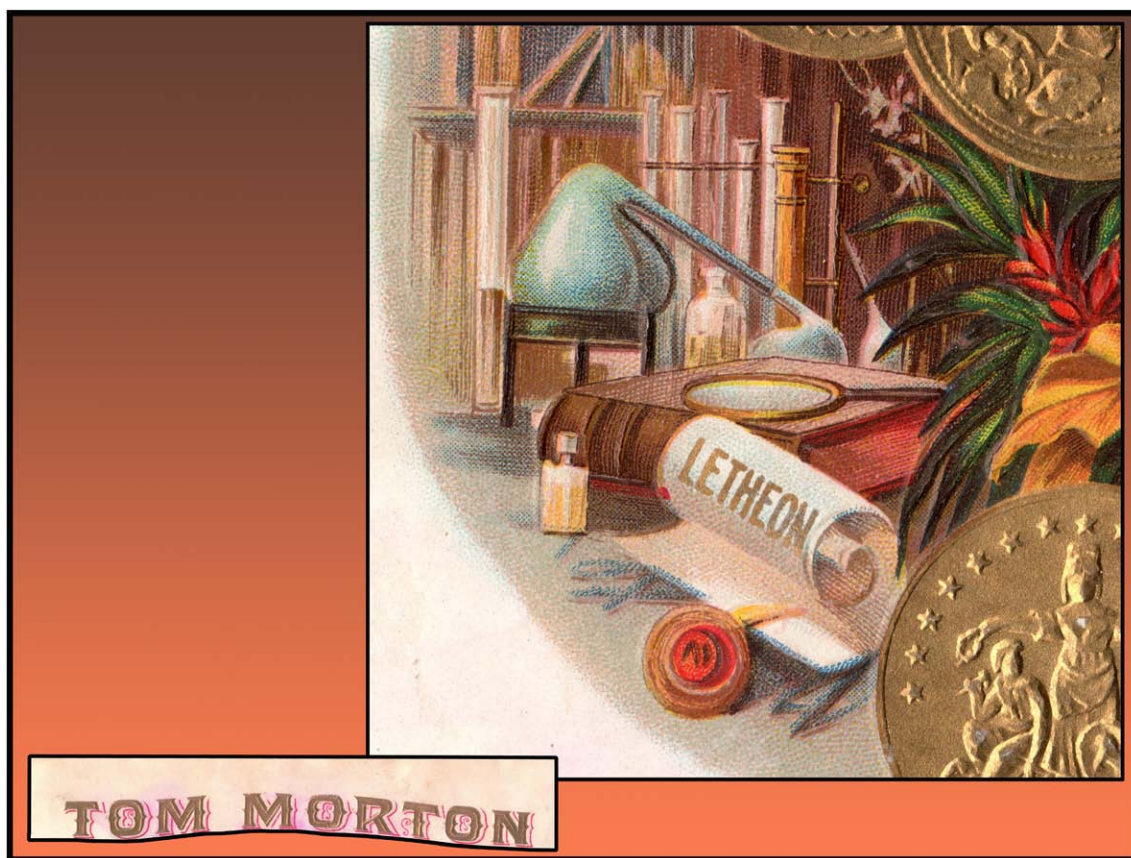

The left side of the “Tom Morton” cigar box label includes items related to Greek mythology and Arabic alchemy. Derived from Lethe, the Greeks’ name for their mythological river of forgetfulness, “LETHEON” is inscribed across what appears to be a scrolled up patent or paper (above), presumably penned by ether pioneer William Thomas Green Morton (WTGM). Synthesis of sulfuric ether originally involved alchemical glassware, the name of which changed from the ancient Greek word “ambyx” to the Arabic “al-anbīq” to the English “alembic.” But what about WTGM’s name? Was he ever nicknamed “Tom Morton”? (Copyright © the American Society of Anesthesiologists, Inc.)

*George S. Bause, M.D., M.P.H., Honorary Curator, ASA’s Wood Library-Museum of Anesthesiology, Schaumburg, Illinois, and Clinical Associate Professor, Case Western Reserve University, Cleveland, Ohio. [UJYC@aol.com](mailto:UJYC@aol.com).*
